# Supplementary material
Source: publisher figshare collection journal article supplement (https://acs.figshare.com/ndownloader/files/4086130)
Supplement: Supplementary file 1 [file 4086130]

**Supporting information:**

# The Alignment of Barium Ferrite Nanoparticles from Their Suspensions in Electric and Magnetic Fields

Darja Lisjak<sup>1[1],#</sup> and Simona Ovtar<sup>#,+</sup>

<sup>#</sup> Jožef Stefan Institute, Department for Materials Synthesis, 1000 Ljubljana, Slovenia

<sup>+</sup> Jožef Stefan International Postgraduate School, 1000 Ljubljana, Slovenia

---

### *MF films from small BaFe particles: preparation procedure and properties*

The whole preparation procedure was similar to that described in the main document, except that the suspension was prepared from small particles (no larger than 43 nm – Table S1). For this purpose the larger particles were magnetically separated from original suspension with a Frantz Isodynamic Magnetic Separator (S. G. Frantz Co. Inc.). The applied voltage was 40 V, which gives a magnetic field of 3.7 kOe. A total of 6 g of steel-wool filler was inserted into the separation column.

**Table S1.** Basic properties of the small particles

| diameter (nm) | diameter (nm)/<br>fraction            | thickness (nm) | M <sub>1T</sub> (emu/g) | H <sub>c</sub> (Oe) |
|---------------|---------------------------------------|----------------|-------------------------|---------------------|
| 6-43 (12±4)*  | ≤ 10 / 24%<br>≤ 20 / 98%<br>> 30 / 2% | 3              | 1.0                     | 29                  |

\* average values in brackets, <sub>1T</sub> measurement at magnetic field of 1 T

**Table S2.** Basic properties of the suspension from small particles

| concentration (g/L) | zeta-potential (mV) | conductivity (μS/cm) |
|---------------------|---------------------|----------------------|
| 7                   | 105                 | 4                    |

**Table S3.** Magnetic properties of the sintered MF films from small particles

| OUT   |         | IN    |         |
|-------|---------|-------|---------|
| Mr/Ms | Hc (Oe) | Mr/Ms | Hc (Oe) |
| 0.67  | 3904    | 0.57  | 3933    |
